# Supplementary material for: Synoptic background of the Adriatic Sea high-frequency sea-level extremes
Source: Copernicus journal article supplement (doi:10.5194/egusphere-2024-1601), 2024-06-05
Supplement: Supplementary file 1 [file egusphere-2024-1601-supplement.zip]

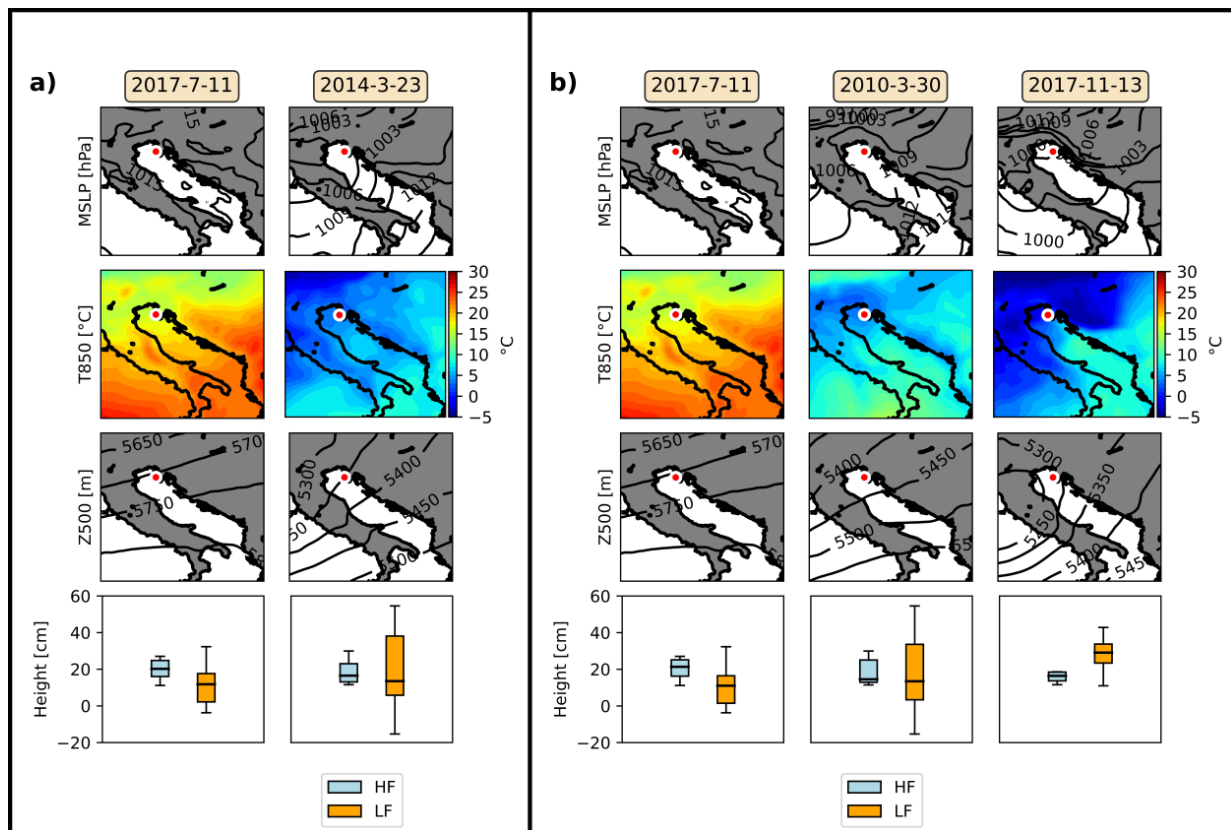

Figure 1S: Medoids for the choice of a) two and b) three clusters for Rovinj. The first three rows are: mean sea-level pressure (MSLP), temperature at 850 hPa (T850), and geopotential height at 500 hPa (Z). Forth row are the box-plots of HF (blue box) and LF (orange box) heights during HF extreme episodes assigned to each medoid. The dates of medoids are given at the top of each column and the location of Rovinj is marked with a circle.

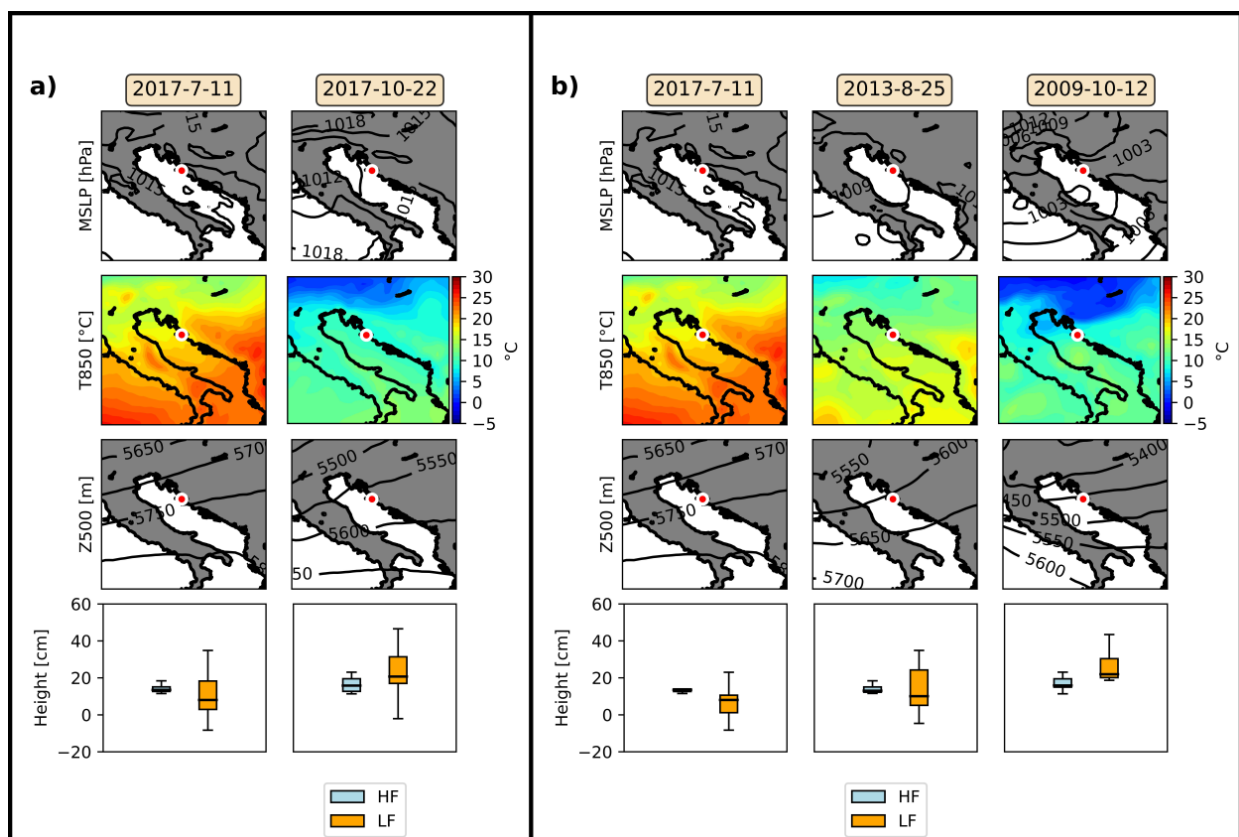

Figure 2S: Medoids for the choice of a) two and b) three clusters for Zadar. The first three rows are: mean sea-level pressure (MSLP), temperature at 850 hPa (T850), and geopotential height at 500 hPa (Z). Forth row are the box-plots

of HF (blue box) and LF (orange box) heights during HF extreme episodes assigned to each medoid. The dates of medoids are given at the top of each column and the location of Zadar is marked with a circle.

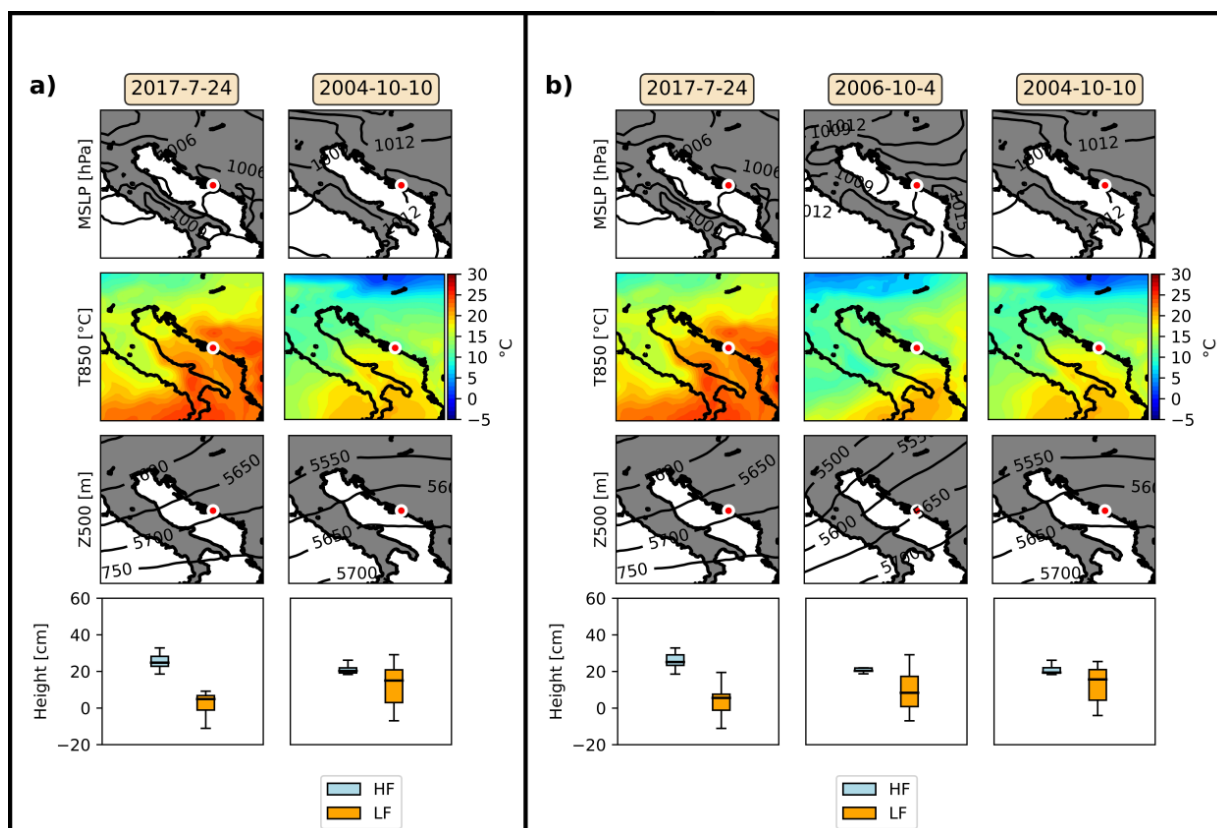

**Figure 3S:** Medoids for the choice of a) two and b) three clusters for Ploče. The first three rows are: mean sea-level pressure (MSLP), temperature at 850 hPa (T850), and geopotential height at 500 hPa (Z). Forth row are the box-plots of HF (blue box) and LF (orange box) heights during HF extreme episodes assigned to each medoid. The dates of medoids are given at the top of each column and the location of Ploče is marked with a circle.
