# Supplementary material for: Synoptic background of the Adriatic Sea high-frequency sea-level extremes
Source: Copernicus journal article supplement (doi:10.5194/egusphere-2024-1601), 2024-06-05
Supplement: Supplementary file 2 [file egusphere-2024-1601-supplement.zip]

Archive with 4 entries (4 files):
- Figures_supplementary material/fS01.png
- Figures_supplementary material/fS02.png
- Figures_supplementary material/fS03.png
- Supplementary_material.pdf
