# Supplementary figures and images for: Synoptic background of the Adriatic Sea high-frequency sea-level extremes
Source: Copernicus journal article supplement (doi:10.5194/egusphere-2024-1601), 2024-06-05

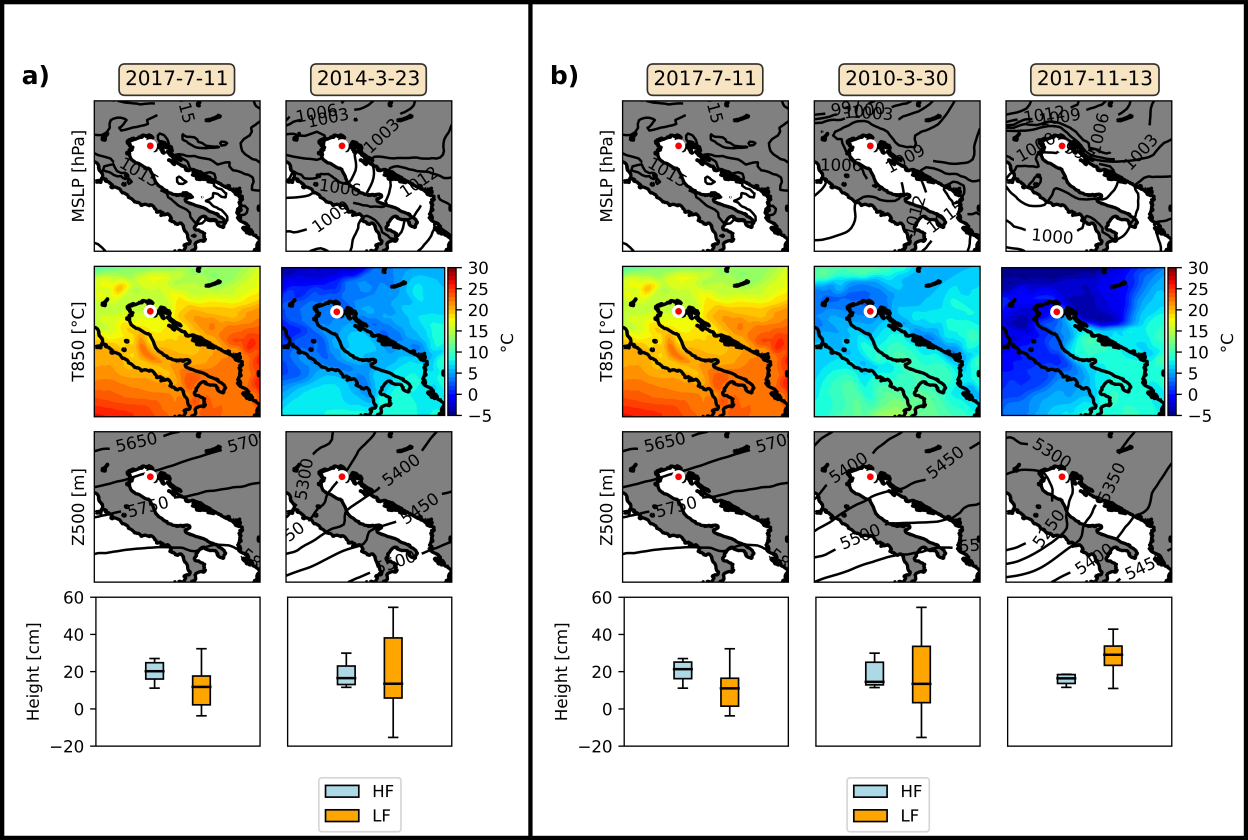

Supplement: Supplementary file 2 [file egusphere-2024-1601-supplement.zip › Figures_supplementary material/fS01.png]

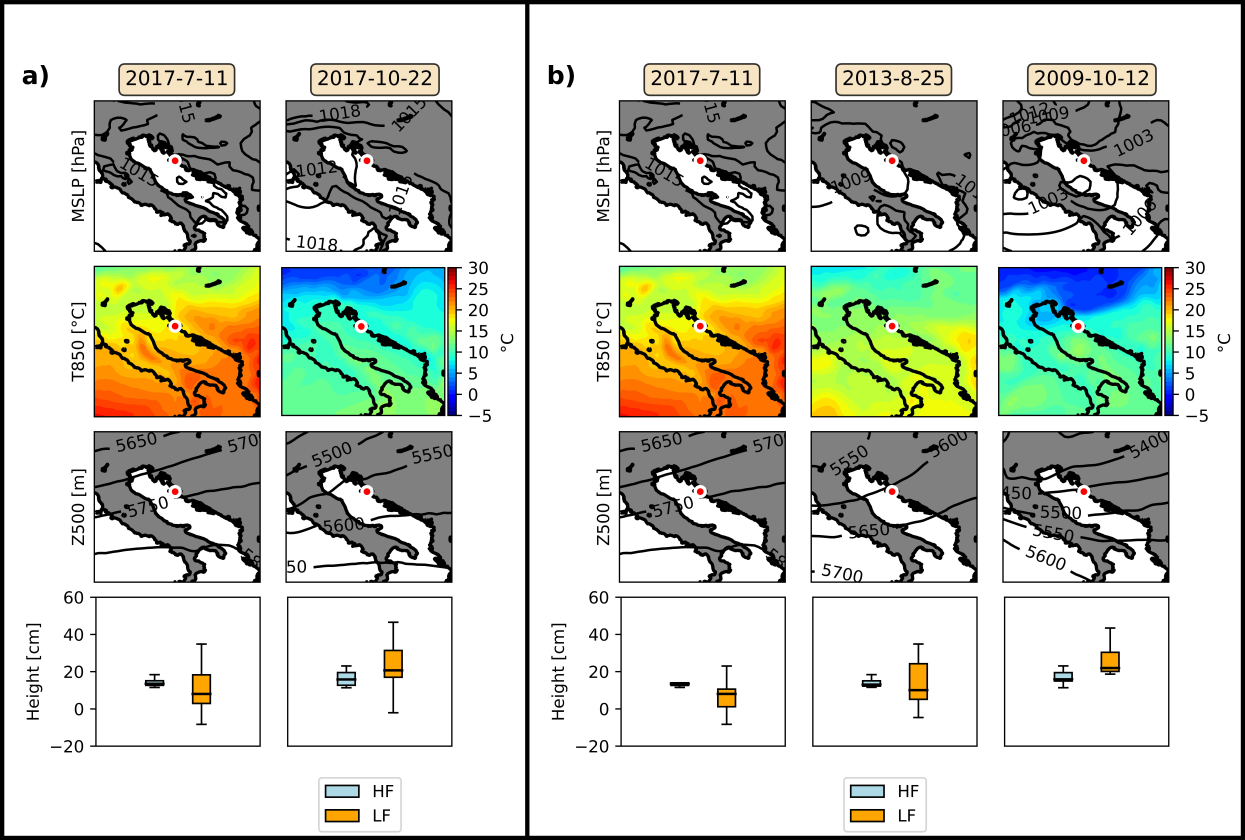

Supplement: Supplementary file 2 [file egusphere-2024-1601-supplement.zip › Figures_supplementary material/fS02.png]

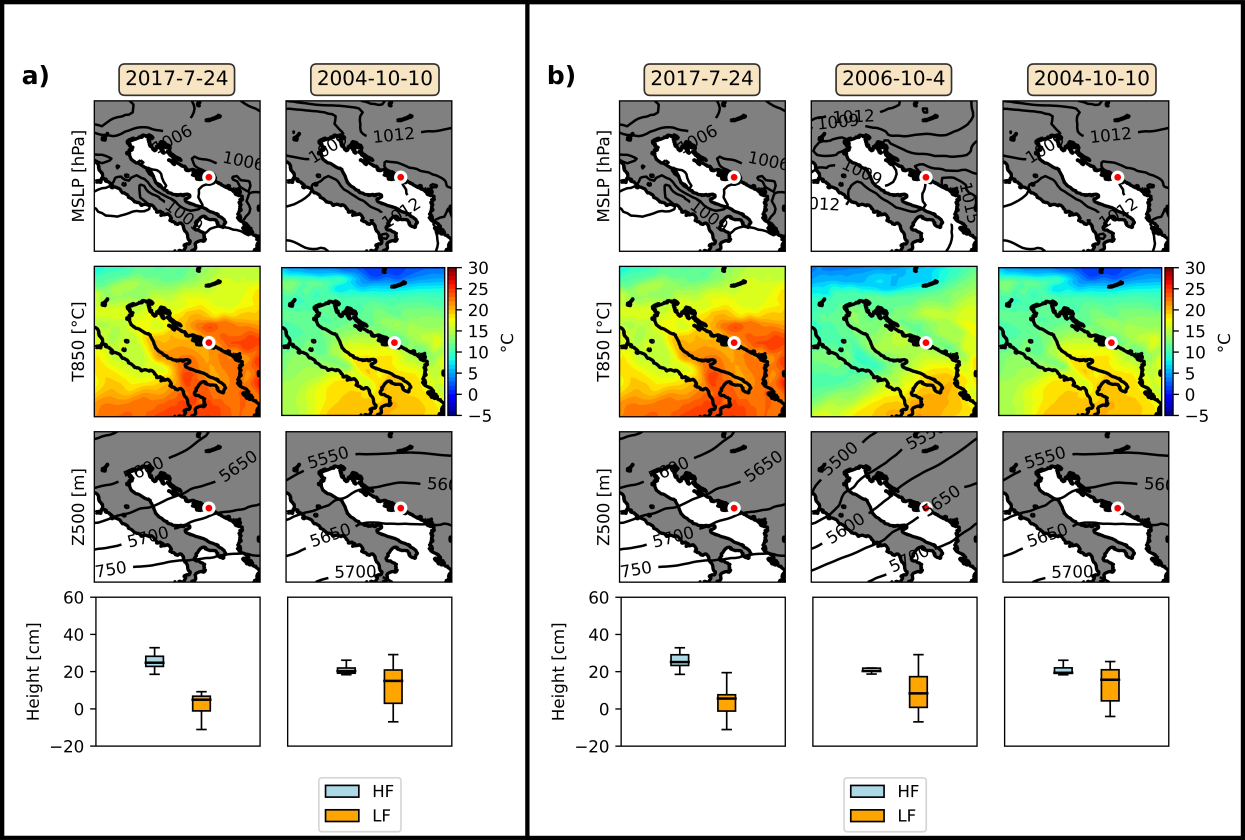

Supplement: Supplementary file 2 [file egusphere-2024-1601-supplement.zip › Figures_supplementary material/fS03.png]
